# Supplementary material
Source: publisher figshare collection journal article supplement (https://plos.figshare.com/articles/dataset/_/121057)
Supplement: Supplementary file [file 1]

| Fly Gene Identifier | Amino Acid Sequence ( <a href="http://www.flybase.org">www.flybase.org</a> ) - longest isoforms were generally used in cases with multiple isoforms                                                                                                                                                                                                                                                                                                                                                                                                                                                                                                                                                                                                                                                                                                                                                                                                                                            |
|---------------------|------------------------------------------------------------------------------------------------------------------------------------------------------------------------------------------------------------------------------------------------------------------------------------------------------------------------------------------------------------------------------------------------------------------------------------------------------------------------------------------------------------------------------------------------------------------------------------------------------------------------------------------------------------------------------------------------------------------------------------------------------------------------------------------------------------------------------------------------------------------------------------------------------------------------------------------------------------------------------------------------|
| CG8445              | MNAAGGGSGAQAAVAAGNNSLSHNALLSTASGATTMPMAQLADGWLELE<br>SDPGLFTLLLKDFGCHDVQVEEVYDLQKPIESPYGFIFLFRWIEERRARR<br>KIVETTAEIFVKDEEAISSIFFAQQVVPNSCATHALLSVLLNCNENNLQL<br>GDTLSRLKTHTKGMSPENKGLAIGNTPELACAHNSHAMPQARRRLERTGA<br>GVSSCRFTGEAFHFVSVFVPINGQLFELDGLKPYPMNHGGWEDSEDWTDKF<br>RRVMAERLGIATGEQDIRFNLMVVPDRRIAITHKLKMLRTNQAIVSGTL<br>QKLLKADEQGESGNGDSQRPDPTTLLLEPSAFTARDLQSLKNDTEIAI<br>NEQHLADENDRRHMFKVDASRRTHNYDKFICTFLSMLAHQGVLGELVSQH<br>LLPSKQVSGQAANRISKQSTTASAGGSTAAGTASTPKTQQQQAAAAKNG<br>KSPSKTPGRRRKGRNKCRKRK                                                                                                                                                                                                                                                                                                                                                                                                                                                                        |
| CG4265              | MLTWTPLESNPEVLTKYIHKLGVSPAWSVTDVIGLEDDTLEWI PRPVKAF<br>ILLFPCSETYEK HRAEEHDRIKEVEEQHPEDLFYMRQFTHNACGTVALIH<br>SVANNKEVDIDRGVLKDFLEKTASLSPEERGRALEKDEKFTADHEALAE<br>GQTNAANHEKVIHHFIALVNKEGTYELDGRKSFPIKHGPTSEETFVKDA<br>AKVCKEFMARDPNEVRFTVLALTAQQ                                                                                                                                                                                                                                                                                                                                                                                                                                                                                                                                                                                                                                                                                                                                             |
| CG3431              | MGDGAGNWCLIESDPGVFTELIREFGCDGAQVEEIIWLDSESFKNLEPIH<br>GLIFLFKWVQEDEPAGKVVLDRENIFFAQVINNACATQAILSLMLNDH<br>EDIKLGETLTNFKEFCQCFDPYKGLTLSNASQIRTVHNSFARPTLFELD<br>TKNQKKDDDVYHFVGYMPIGGRLYELDGLREGPIDLGEIKSEQNWIDVVR<br>PIIEKRMQRYSDEIHFNLMALISDRQRIYEQQIEKLLNPAPNAMDTEED<br>RQAEISSLRTYIEYEIQKKRYKVENVRKHNYPFIVELLKILGENGQL<br>MPIYEKAKQORALEREQAQRKKDTD                                                                                                                                                                                                                                                                                                                                                                                                                                                                                                                                                                                                                                         |
| CG5798              | MAKLLKLHMSSNLDDLEKMSIIPDLRSKGMKILLNTARKLYMTAEYRLD<br>GDEELAYITYMKYFNMLTAIHKKS DYPSHKTTVRQMLGDTESNRRIMDTL<br>EEIINSLRHRYAQHQAPEPIAPDLVSNRAGVDSPITQPTQYARLGLIT<br>CQDLYRRMQEKSVLVMDCRPSADYEASHLTYCAFNVPEELITPGMSAGR<br>LQARLSSSAKASWASRSVKDSVVLMDWNTKDAQPATNTAISTLLDILKNW<br>DPDVTYRAPIQIVEGGYEFIMMYPTHCTNPSVQAPQONNDIETIDDIE<br>YPSIHDITMKEDISAKDFRPRPDFNRANKPAATRVNEOGISRPSPPAKPI<br>AEIMRDQAEFLQRAEQNDEOLEKASKMWRQAAEGDGLNATEDQELHFRI<br>LQLESKAQDIYIVENNRLREELSRIQELHNVTOQLSQUEVEATRNIESKIR<br>ERQRLDEQHELERQERERLLAIARETKKHYKSPTPSGPPSPGRNLEDVHV<br>VSDSLESLLQLTGDPDPTIAPNKAEIPTFDRAMKQPRNVERTSQRVRDF<br>SPVIGQNVGRGLTGLKNLGNTCYMNSILOCLSNTPQLTEYCISDKYKNYI<br>SRSNKTNGQVIEEVAALIKELWNGQYKCVASRDRLRYVVGQYQKIFRGVDQ<br>QDSHEFLTILMDWLHSDLQTLHVPRQREMI SASEKAWLEFTKAKESMILH<br>LFYGOQKSTVKCVACHKESATYESFSNLSLELPPNSNVCQLNQCMDMYFS<br>GERIHGWNCPSCKTKRDAIKKLDISKLPPVLVHVKRFYADPSNSGSYMK<br>KQNYLRFPLENLDMPYIARAESRAVTPKTYQLYAVSNHYGTMEGGHYTA<br>FCKSANYGKWFKFDDQVVSALDSSNVVSSAAYILFYTWLPPMQVPL |

CG8334

MLYAACGGTQRGISFNLLCGLVLI TRGTQAEKTKFLWNLYCNDAGTFII  
KSDYVRNVNLAPFESVSLFAQSERVNF EQFQDWI IKHRNATVLSKWLLSD  
NCVSLTSELETPTFYQSLAGVTHLEEKDIGDLEKEFWRLKNTSQNGQIDL  
QFLGPLISPPIPKNALAGLFNAFDENRDGHIDFKELCCGVSAACRGPVE  
RTRFCFKIFDVDRDGVLSHDETLQMINVLLLVAKENQESQOYKDLTKQLV  
ISDLLLEFGQRRSPDGTPSKLTRDNVSLTAEDFMLWTVQCDLRLMQPLLDL  
IFELCHIVFGLWPQCKHMENDIVRGWLRREERRPYRVGQFWYLITHDWL  
SWMQYTOHTTHTCDYCKRTASQRTAVDEALVCDESFNTHSLEQHDSYSLG  
SGTGSASGSGSASSGISAGRHC GPVRPGPIDNSNLITANPFRNVRTLGE  
GGHLKRDTPLVQNHDFELVPKSLWKALNRWYGDNLPLPRQVIQPPNSDVE  
LELYPLNLRILLHQAQPSQTGVGGGTQLGSWGSTVSGGYGLASGGGYAA  
IAVSSVLQPPKRYLAYTAAFSRLATVRQVGEFLCEQLRLKSEDIRLWHVP  
QLDNGAILLEEDAMCLKELLIRDNDQLLLEIRNKDLTWPEELGSLATAQC  
GQGAGTPGDRRRLTRSSIMSVHAPGATGLHNLGNTCFMNAALQVLFNTQP  
LAQYFQREMHRFEVNAANKLGTKGQLAMRYAELLKEVWTATTRSVAPLKL  
RFCVNKYAPQFAGGGQHDSQELLEWLLDALHEDLNRVMEKPYSELKDSNG  
RPDKIVAAEAWSQHHARNQSI IIDLFYQGLKSKVSCLCGCHESVRFDPFS  
LLSLPLPVENIYFEVLVILLDGSVPIKYGFRNSDCKYSHLKHKLSTMC  
SLPPNMLVCELWNSQIROVLNDDEKLRTQSAKELYVYQLPEQSMRTRSN  
SGLSMHIEQGLKDIQRSSALITSAQDSLSSLSTLQTS SHRASSRVLCNGH  
VSGLDVEGEAEVGT DVSQCNSNSYNPIVSTYSGNGSGDNQVHELLPDEA  
GKDSELAPQRRNCCYSRMIYRRVVF DCECEIRQESASVCFSIESLILSSS  
PENTFMHGAAAQOKRVSSAKLLHTESNTSSMSYTNHSGENSMESLTEPI  
PLADLEPVSSRNGSGGEDCSYRTSPNDSSGLSTGHTLGASLDVDEQAEEG  
NAEDHDQPDQITTSQPETSSGVYSRRSSQPPHKAGKYLVAVHRKITRHDS  
YFLSYHKTRPSLFGVPLLI PNSEGGTHKDLYCAVWLQVSRLLSPLPATTE  
QANHAADCDDSLGYDFPFTLRAVKADGLTCAICPWSSFCRGCEIRCNNDY  
VLOGALPPINAAASNTSTPKMNAKFP SLPNLEAKRTPEY TASLSYTPTK  
YFEDFTIAIDWDPTALHLRYQSTLERLWVDHETIAISRREQVEPVDLNHC  
LRAFTSEEKLEQWYHCSHCKGKKPATKKLQIWKLPPILIVHLKRFNCVNG  
KWVKSQKVVFHFPDFDPTPYLASVPQETILRHKELLELKNDAEMTMATN  
EVVSELDEIDAPSKEVKEELPNQ TGSTKATASPPPTGNILRQSKTKNAVR  
RQRLISTSLTKTPIVDGEFEDYHQHRLKPDVDQFDPRYRLYAVVSHSGML  
NGGHYISYASNATGSWYCYNDSSCREISQKPVIDPSAAYLLFYERKGLDY  
EPLYLPNIEGRTL PNTASVPLEVDETEGELKKLCSIS

CG12082

MEELRKHLSKVNVPKASGAGSPPIYKDECYVSYDNPETPTGLYVCLHSFL  
GFGEAYVREYADKTGNRVFLHIQRVKTIKEGADMEAECAESEAGPERKIT  
RLAIGVEGGYNESDMAKKYEIKDTYSIVVAPHLDKKLPYPPELPMRVTO  
SVEAILAADSIAKLEKATLMGTWDGEVRQASKYADNLQQLDNGKRIPPS  
GWQCEKCDLTNNLWLNLTGDSIMCGRKFFDGSGGNDHAVEHYRVTFPLA  
VKLGTITADGKSDVFSYPEDEMVLDPHLERHLSHFGINMAAMKKSEKSMV  
ELELDINQRIGEWALTETESESELQPVAGPGYTGMRNLGNSCYINSVMQVL  
FVIPDFQQRVFGTGAERYFKEFPSPANDFNIQMAKLGTLQSGKYSSIA  
ENTLDTDHSTGISPAMFKNIVGKNHPDFSTKQQQDANDFYLLHLLTLLDRN  
SRNQTPADALKFLEDRVECLASHKVYNTREEYSFRLPVPLDKATNLD  
EVREFQERKKAARETGQRLPDRDIVRHKVPLQACLERFFGPELIEQFYST  
AIGSKTNARKITRLATMPDCLMIHVGFKFTLGDDWVPKKLDVSVDMPDELD  
LSNWRASAGGLQPGEEALPEPATEEVKFAFDEAVMSELLTMGFPEACKRA  
CYHTKNSGLEAASNWLMEHIADEDISEPFVVPNNSIGDCAANQFVANPES  
LAMLMSMGFDERQAVAALKATDGNVERATDWIFSHADSIGVEDAAPAANS  
SAAAASSTPNKTNYRDGRGKYRLVAFISHMGTSAQVGHYVCHIRKKGEWV  
IFNDSKVAKSQNPPKDLGYLYLYMREQ

CG1490

MEIETDQSIAMDTQDTQOEVEILTSDLQOTQQQRNSPPQLPKFKNLIQPO  
LHAVGAVTQLPSENGMPPQQLLADSSSTSFGDGEAMGIDDESKEDQFRS  
ETTFSTVENNVQLKSQRLSPPVYVRMLPWRIMVIPNDRALGFFLQCNGE  
NDSPTWSCNAIAELRLKCHKPDAQPFTRARIKHLFYSKENDYGYSNFIW  
QELKDSEKSYVHNNSITLEVHVADAPHGVLWDSKKHTGYVGLKNQGATC  
YMNSLLQTLTYFTNSLRLSVYRIPTEADDSSKSVGLSLQRFVHELQFGDRP  
VGTKKLTKSFGWETLDSFMQHDVQEFRLVLLDKLESKMKGTILEGTIPGL  
FEGKMSSYIKCKNVDYNSTRYETFYDIQLNIKDKKNIYESFQDYVAPETL  
EGDNKYDAGVHGLQEASKGVIFTSFPPVLHLHLMRFOYDPVTDSSIKYND  
RFEFYEHINLDRYLAESENTLADYVLHAVLVHSGDNHGGHYVFINPKAD  
GRWFKFDDDVSSCRKQEAIEQNYGGMDDEISFHAKCSNAYMLVYIROSE  
LDRVLDGITESEISSDLVERLDLEKRIEMARRKERGEANTYVSVHVILEE  
NFEEQHKRRLFDLEKVHPRVFRIKQNQTVDELVDLDFVRGFGVSRQRMW  
NLCTAQTKFQSHFDVAEGSRTIEQISTSQKPWVIWLQLAWTDVPGPLPP  
FNPKTESLLFLKYDPRNKRLNYIGCTQOPHTRRLIDLVPDVNSKLGFEF  
DTELTIDYDEYADKKLVNLNEPIESALFIPQDHLQGHILIFERENVDKLD  
LPTVGDYFLDLVYRIEIIIFSDKCNPNPDPFTLELSNRYNYDQLANAVAER  
LNTDPQKLQFFMCINNYKETAGNAVPTYTFKGTIKDLVSYTKQSSTKRIFY  
QRLSLSIHELNDKKQFKCVWVSSDLKDEKELVLYPNKNDTVKGLLEEAAK  
KISFAENSRRKRLRLKISNHKIVAVCKDDIPLDTLLKSNESITTAOQAQK  
TFRIEEVPAEDMQLAENEFLIPVAHFASKELYNSFGIPFLTARQGEPIYGA  
LKQRIQRRLNVQDKEWENYKFCVISMGNADVNDNTPVDLEVYRSWTSQO  
LPFFGLDHINKSRKRSSLNFSEKAIKIYN

CG7023

MGANVSQLEREIGSDLFPPNEHYFGLVNFNGNTCYSNSVLQALYFCKPFRE  
KVLEYKAKNKRPKETLLSCLADLFYSIATQKKKVGSIAPKKFITRLRKEK  
EEFDNYMQQDAHEFLNFLINHINEIILAERNAGPSNGNPKATNQQGSTSA  
MASSIASKSSSTSNSNSNSNSTTNSNGNSSNSTGSLNANTSVLDASGSLT  
ATTTPIISGNGTGTNGANSEPTWHEIFQOGILTSETRCLNCETVSSKDEN  
FFDLQVDVDQNTSITHCLRCFSNTETLCSDNKFKCDNCCSYQEAQKRMV  
KKLPMILALHLKRFKYMEOFNRHIKVSHRVVFPLELRLFNSTDDAVNPDR  
LYDLTAVVIHCGSGPNRGHYISIVKSHGLWLLFDDDMVDKIEASTIEDFY  
GLTSDIHKSSSETGYILFYQSRDCA

CG5384

MPAFKVKVKGRELYTDIVVNTDEEPILFKAQLFALTGVQPDRQKVMCKG  
GILKDDQWNLOIKDGAVVLLLGSKESVPEVPATPVKFI EDMNEAEAATAM  
RLPAGLTNLGNTCYMNATVQCLNAVPELRTALSTFSNDGDTMSTAFSIS  
SAMKSIFAQMEKGTTVTPIVLLQALHRASPOFAQTGENGTYRQODANECW  
AEILKMLQOKLRPKNQEPSNTVQKRHSSFIDQFFGGTFEVKMSSEEDPDE  
PSTVTSENFLQLSCFISMDVKYMQSGLKSKMKEQLVKKSETLGRDAKYIR  
TYLVSRLPAYLTVQFVRFQYKQKEGINAKVLKDIKFPIDFADFELCTPEL  
QNKLCPMRSKFKDLEDKKMEVDVVKRNEPNEEKKDVKYEQFWFDDDLGSN  
NSGYITLQAVLTHKGRSSSSGHYVAWVRSSGDVWFKFDDDEVSAVATDEI  
LRLSGGDWHCAYVLLYAPRRLEKL

CG8494

MSLSSNPNPHPYVEHRNRTIHSSQGHTLANGYAMGDPRSSRCHDKLFSG  
SLKSLARREDSNASDSEGTD TAKSGTGLVGLQNIANTCYMNSALQALSN  
LPPMTHYF INCSDLVEYIAEQSARRCKPGLAKSYRRLMQEIQWQVDDPK  
EFIAPRGILYGIRTVHPMFRGYQQHDTQEFRLRCFMDQLHEELTEQVSMLP  
QTONQPOYQSLQQQPSETDDENDDEAAPASLSHASESEYDTCESSMSER  
SAEVLKTEYFVTPCRTNGSNSGLPEGHSVQLQQAPLQHQQKNASSAEQK  
PIEAARSIISDVFDGKLLSSVQCLTCDRVSTREETFQDLSLPIPNRDFLN  
VLHQTHSLSVQSLNAAETSARTNEGWLSWMMNMLRSWIYGPSVTLYDCMA  
SFFSADELKGDNMYSERCNKLRTGIKYSRVLTLPEVLCIHLKRFRNDLS  
YSSKISSDVYFPLEGFDMRPYIHKDCKSEVAIYNLSSVICHHGTVGGHY  
TCFARNTLNGKWYEFDDQFVTEVSSELVQSCQAYVLFYHKHNPQMKLVRD  
EAMTLTSTHPLCDSDIQFYITREWLSRLATFSEPGPINNQEMLCPHGGIL  
HSKADVISQIAVPISQPLWDYLYRTFGGGPAVNIIFECEICKRAAETLSR  
RQOYELNEFTKYNGLQNEFDSTAIYAIAMPWLRSWQOFSRGKTHKDPGPI  
TNEGIAAPTENGSA TVSCVRLGSDYAQLNARLWRFLHNIYGGGPEIILRQ  
ALSDEDDAEIEIIDQDDECDDEDDQDLEGEDEDEEIAAASYQHNHSDTE  
SNLGIRNTPSPSPSTSPSPSLTGTRQPMETESDLRPSSSKSKRSRSMKV  
SALRLNMRNRGKRNRSAFKQYAEMFGAKGNYNNAHSNAEPVVSEKDEKDKD  
NDRTVAFPSSEYSLPISIPFQSDNFQVNGVHEKSRDKGKLRNSSKSGSTAA  
TKENVTLQKFVTLREANGPSDETDI

CG3016

MESEKILMAAGVTVAAVVGAFVFWGPGSGSRLRQRRGQIAGLHNFGLTCFL  
NTLLQAMAACPOFIAWLQLYNNASPRKSLITSMLENTLEVNGTHATLRG  
DPYSPGAVLRALNALGWVIPQEEHDAHELPHVLLTCLLEEEAIRPOPLGCL  
SDALPTDNDNSSLAGTATPVGGFRSFSMAAGLGASORIGDQPNRPSSA  
MLTDFLNMEYDESTSLQRLVRSEAHTPDSPASVCERDGNDRLGSVLLDAV  
SPGTPFGFPLVSNPDSLATPMLGGERSSRRLPQSQQQQDEGLNRRVSSS  
CRSLERLHRGPGRVSIWSNMMPQVAHPFQAMGAQIVCNGCGSKSAVRY  
DKFDSITLNLPPQRRRTGLSLGHLLSEYITSEDLSDVKCDSNETTTHTKS  
VTFAKLPACLCIHVARTVWLPTGQVCKRKDYVHFPELSMAPYSFVQPHL  
NSOAGTPWGSTMSLYSSSLPMNNGVGGGEGFGTMFPKNLYRLLAVVVHSG  
EANSGHFVTYRRGSLRNAHRWYYTSDTIVREVSIDEVLSVPAYLLFYDRG  
QORQLNLR

CG5603

MNSKSDYEAKEKKTITNRFGDSLENYELSNESSEHKTHVYPKIPNRKN  
GILKNTDANHSAVDNQHLEDVDLADILGTNWPKRAGPAAMILNNKSKTDP  
SNSVDLILKPASPILKIEPEEPLRFTIADYQPLIEIPGTELAIGSLVEVS  
NPGVCELDYGVVRWIGIPPGPQKNVLVGVIEVEDESNLKNVVASDGRHNGV  
RLFTCHDGRAIFVPANRCTADRRFADVDNSISANRVSSNHAKKFGVADCP  
AIYGSIPPLQIHNSDELASICGKFKGIQGHNSCYLDATLFSMFTFTSVF  
DSILYRRPGPQDIRNYSEVQKVLRDEIVNPLRKNVFRSDRVMKLELLD  
QLSSVSGLTCEEKDPPEEFLNSLLSQIMRVEPFLKLSSGQDSYFYQLFVEK  
DEKLTLPVSVQQLFEQSFHSSDIKLEVPSCFIIQMPRFGKNYKMYPRILP  
SOVLDVTDIIENSQRQCSLQGLAEYECRDCFGSLQAGSGLECTAFPCPK  
LKTFFSHIKRTNHVSKKIYSPKEFKIMAEHMVVPRLYMELFAVVCIEYSH  
YVAFVKSGSGPDAPWCFFDSMADRKGEQNGYNIPEITCVPELTQWLSEEG  
ARSINETSTNDKVLPEHAKRIFCDAYMCLYQSTDIMMYH

CG3781

MESPSARTLGNLGGDDSGNGNENGGSGNGNTTMMPHGIYHERQTRHLCG  
LHALNNLFQGPDMFSKSELDDYCTTLTPRNWLNPHRSWIGWGNVDVNVIM  
YALQORNC EAVWFDRRRDPHCLNLSVIFGFILNVPAQMSLGYIPLPFHM  
RHWLALRRLNGSYNLD SKLREP KCLGTEQQFLEFLATQLQMDHELFLVL  
DEETDCKDKSQORWLLPQFRD

CG9448

MCDTKDDAQKWCETCTYENYPSSLKCTMCQASKPLL NEDIFRLSPAQES  
CTVAEEAAA VEAVMSPTPSSTCYSLOPQSQARQSNVADSEKWPKVCTY  
LNWPRSLRCVQCCTKRGGEA IERGKMDNEADGD RAGEALQALRISGSE  
ENLANKPVQLIGATASHRLSLSRGIDDATHLNNLANASHNQSOSQHRQPV  
LQQQMQLQLOPQQQRESSSSAAVPPQQQKQCYVSKWACNSCTYENWPRSI  
KCSMCGKTREREISGSQNDLHASSLSNSQEENQQQLQOPNVDTVSVNNSF  
NKKHIYQLGSSETINNCDTLQERQERRORQIRROVDWQWLNACLGVVENN  
YSAVEAYLSCGGNPARSLTSTEIAALNRNSAFDVGH TL IHLAIRFHREEM  
LPMLLDQISGSGPGIKRVPSYVAPDLAADIRRH FANTLRLRKSGLPCHYV  
QKHATFALPAEIEELPIPIQEQLYDELLDRDAQOLETPPPALNWSLEIT  
ARLSSRMFVLWNRSAGDCLLDSAMQATWGVFDRDNILRRALADTLHQCGH  
VFFTRWKEYEMLQASMLHFTLEDSQFEEDWSTLLSLAGQPGSSLEQLHIF  
ALAHILRRPIIVYGVKYVKSFRGEDIGYARFEGVYLPLFWDQNFCTKSPI  
ALGYTRGHFSALVPEPFTRIDGRRDDVEDV TYLPLMDCELKLLPIHFLT  
QSEVGN EESMMRQWLDVCVTDGGLLVAQQKLSKRPLLVAQM LEEWLNHYR  
RIAQVITAPFIRRPQITHYSSDGSDSEE

|                       |                                                                                                                                                                                                                                                                                                                                                                                                                                                                                              |
|-----------------------|----------------------------------------------------------------------------------------------------------------------------------------------------------------------------------------------------------------------------------------------------------------------------------------------------------------------------------------------------------------------------------------------------------------------------------------------------------------------------------------------|
| <p><b>CG4603</b></p>  | <p>MTGSFSVKLKS KKGQFIVNDLNEHTTLGELKTKIVQATDIEATQLHVLVG<br/> YPPKPLDLSQQQEQRALKAVGINSGETLIVEEKAAPAPAAPVPGGTTVED<br/> DEALARRLQAEFEAQLLQETAGGPVAQAADYQLPVAPTESGPNDFNGIL<br/> LKKVVPADNSCLFITSIRFVLNGKVDNEGSEMRRHIIAQEVAADPOSYNDA<br/> VLGKSNAEYCAWIQKADSWGGAIEVSILSNYYGIEIDVVDIQNAIINRFG<br/> EDKNFGLRVFLFDGIHYDPLYMETSPSAAPATIFPVEELGVYQQAQLA<br/> NEAQSSRQYTNVDKFTLRMCQCDVRLVGQVQAQEHAKQTGHKNFGEI</p>                                                                                        |
| <p><b>CG4968</b></p>  | <p>MEPFTHNDGNRDELI IQQRDIEKEISDTTPLVSEQLPLTCLYAEYSGDE<br/> IFTAKIQDLSKKYKFI RRTRPDGNCFRAFAYSYLEYLISNTSAYQEFKK<br/> LAEESKEKLVQLGFPSFTLEDFHETFMEVIQRVSPDNAGGHSTVQDELHK<br/> IFNEQGYSDYVVVYLRLITSGLQEEADFYQNFIEGDLTIEAFRHLEVEP<br/> MYKESDHIHIIALCTALGAGVRVEYLDRGEGTVKAHDFPEGSEPRIYLI<br/> YRPGHYDILYPN</p>                                                                                                                                                                                    |
| <p><b>CG2224</b></p>  | <p>MSKAVNNMSMGDVEPQERMKHLSHCGNLI EVDKNMPVTRYRSGTEMLRM<br/> ANVYLREGNHENAFILYLRMTLFI EKIROHPDYGSVKAEVRDINRKIKD<br/> EIMPTTEKLRKLLTHYQREYEQFLASKEAERVKELERERERERERERQOK<br/> EREKAGSSAIPSLIPANLHVLIDEGNQPSAPDLGLLDQVVYPNDFPTGAN<br/> RSLPGSGLLLPAASEAAADKTTNSKPSFDRNQKPSYNRTDSLLAGSLRLV<br/> YVPGDTMEVFLKLALANTSKNIETCGVLAGHLSQNQLYITHIITPQQOQT<br/> PDSCNTMHEEQIFDVQDQMLITLGIWHTHTPTQTAFLSSVDLHTHCSYQI<br/> MMPEALAIVCAPKYNTTGFFILTPHYGLDYIAQCRQSGFHPHPNDPPLFM<br/> EAQHIRMNDNQAKIKVIDLRR</p> |
| <p><b>CG18174</b></p> | <p>MDRLLRLGGAMPQAAPPTDAPVVDTAEQVYISSLALLKMLKHGRAGVPM<br/> VMGLMLGEFVDDYTVQVIDVFAFPQTGTGVSVEAVDPVFOAKMLDMLKQT<br/> GRPEMVVGWYHSHPGFGCWLSGVDINTQOSFEALSERAVAVVVDPIQS<br/> VKGVVIDAFRLINPNMLVLGQEPRTTNSNLGHLQKPSVQALIHGLNRHYYS<br/> ISINYRKNELEQKMLLNHLKKS WKDGLTSLSDYNEHCSINEDTVAEMDLA<br/> KNYNKSLEDEEKMTPEQLAIKNVGKQDPKRHLEEKVDKVMQNNIVQCLGA<br/> MLDTIVFK</p>                                                                                                                               |
| <p><b>CG6932</b></p>  | <p>MEQMEVDVMSAKPSTSSSAAAGSSMAVDKTADQNPQPQGNIMAAAGTSG<br/> SVTISLHPLVIMNISEHWTRFRAQHGEPRQVYGALIGKQKGRNIEIMNSF<br/> ELKTDVIGDETVIN KDY NKKEQYKQVFSDLDFIGWYTTGDNPTADDIK<br/> IQRQIAAINECPIMLQLNPLSRSDHLPLKLFESLIDLVDGEATMLFVPL<br/> TYTLATEEAERIGVDHVARMTSNESEKSVVAEHLVAQDSAIKMLNTRIK<br/> IVLQYIRDVEAGKLRANQEILREAYALCHRLPVMQVPAFQEEFYTQCNDV<br/> GLISYLGTLTKGCNDMHFVNKFNMLYDRQGSARRMRGLYY</p>                                                                                                 |

|                      |                                                                                                                                                                                                                                                                                                                                                                                                                                                                                                                                                                                                                                                                                                                                                                                                                                                                                                                                                                                                                                                                                                                                                                                                                                                                        |
|----------------------|------------------------------------------------------------------------------------------------------------------------------------------------------------------------------------------------------------------------------------------------------------------------------------------------------------------------------------------------------------------------------------------------------------------------------------------------------------------------------------------------------------------------------------------------------------------------------------------------------------------------------------------------------------------------------------------------------------------------------------------------------------------------------------------------------------------------------------------------------------------------------------------------------------------------------------------------------------------------------------------------------------------------------------------------------------------------------------------------------------------------------------------------------------------------------------------------------------------------------------------------------------------------|
| <p><b>CG9769</b></p> | <p>MSALNLTVRVHPVVLVLFQVVDAFERRNADSHRVIIGTLLGSVDKGVVEVTNC<br/> FCVPHKEHDDQVEAELSYALDMYDLNRKVNSNESVVGWWATGNDVTNHSS<br/> VIHEYARECNPVHLTVDTSLQGGRMGLRAYVCIQLGVPGGKSGCMFTP<br/> IPVELTSEYEPETFGLKLLQKTGVSPAHRPKTVPPMLDLAQISEASTKLQ<br/> SLLDLILKYVDDVIAHKVTPDNAVGRQLLDLIHSVPHMTHEQFTQMFNAN<br/> VRNLLLVIITLSQLIKTQLQNEKLTFLPTA</p>                                                                                                                                                                                                                                                                                                                                                                                                                                                                                                                                                                                                                                                                                                                                                                                                                                                                                                                                         |
| <p><b>CG3416</b></p> | <p>MPSQEVSVNKVIVHPLVLLSVVDHFNRMGKIGNQKRVVGVLLGCWRSKGV<br/> LDVSNFSAVDFEDDDKDKSVWFLDHDYLENMYGMFKKVNARERVVGYHT<br/> GPKLHQNDIAINELVRRYCPNSVLVIIDAKPKDLGLPTEAYISVEEVHDD<br/> GSPTSKTFEHPVSEIGAEAEVGVVEHLLRDIKDTTVGSLSQKITNQLMG<br/> LKGLNAQLRDIKQYLQRVGDSKMPINHQIVYQLQDIFNLLPDITNDQFTG<br/> TMYVKTNDQMLVVYLASMVRSIIALHNLINNKLANRDAEEGKSDSKEAKE<br/> KNKDSKDKDNKETKDKDGKKAEEKADKKGKDEGGKGSRK</p>                                                                                                                                                                                                                                                                                                                                                                                                                                                                                                                                                                                                                                                                                                                                                                                                                                                                           |
| <p><b>CG5505</b></p> | <p>MPVSMVAVCETANVVNAALRESLGGNSSAGSSTDOAKSGEDTNGSLQNHIV<br/> ANAKRILMAKIEYEEVPNYHESVLENLKSXYIVIKPGNPGAINGFSGKNN<br/> TGKLVGANGHDNNGARKQAEHPNNQSHHINHHNHQHPTSNPNELPKPKRV<br/> LYPRENIRIGWKQSERKWQVGTGMINVGNTCYLNSTLQALLHIPALANWL<br/> VSEQAHLADCNVAEPGSGCIIICAMTKTLLATQSNQSAVRPFLIYSKLGQI<br/> CKHMVVGRQEDAHEFLRFLVEAMERAYLMRFRNYKELDQLVKETTPLGQI<br/> FGGYLRSEVRCLSCNHVSITFQHFQDLLLLDIRKADSLEDAFEGHFSRERL<br/> EDMGYKCEGCKKKVSATKQFSLERAPITLICIQLKRFSMIGNKLTQKQISFK<br/> SRIDLKSKYAARSQAAQAQPLTYRLVSMVTHLGASQHCGHYTAIGSTDTGS<br/> FYNFDDSYVRPIAMHVCNTNAYIMFFELDLSQAASPAANRPNGVRLTNG<br/> HSTTPVPAATVSSPSPTRFIIPQLPAGGANGYTNGNAQKTAIQFKQONQO<br/> SPQNGLQLGTKGFQDTAKPPLVGAHAKGEATSAPTANGNKSSSPSSNSSS<br/> NHKSIHQOYLPISSDDEDEIDEMKPRPTTAQLPSMPNMTENHTEPKAKS<br/> PVKIQVKTTPVKTPLKSLVPYESASEEEEEAPLPNPKRPSGEDSSESDQES<br/> GQTNGHSTNGSHTNGSASSSVHVNSKQKTDIDAIDEIFKSLKKSADSDDED<br/> DDEEEPSIQLTNGWHPQKQSQSQSKAPPSPKTPPSPAVIKSKTGIWKVTR<br/> NDEVDAIEDDQVDDVVVEGSPVKIPTPNKNHRNPFSSSKPSTDSPATPGAK<br/> RQKLLNGSALKSHQQPRVGNQYQSNATSNGSTINELLKQSYRQYGSPLS<br/> WNGKPAELEKETFELVCAKRIAGHGSVEGSDIVEGSAVDAAVTSGSDSK<br/> DVVVIAVALLVDAREQRQRDIDDDEENEMDRGRQRKVKSGSAKGNNASNS<br/> TPGYNPFQYEGQKRWNKNGGGGFPRFYNQNYRQNFQQRNKFKFNRFGG<br/> PGSAKFQQQRALQRHLSAGGGFSRRQPSAQOQQOQT</p> |

CG5486

MTDKESEQCTVSVFDQTPGSEQKKINVVVRSHFTVKRVIDLIGTQFSYEK  
FELLLOPHDNKDLVNLNALESQOLMYEVAGFEPQLKNHLILLPSGSDGDV  
TKRFELPIKRVVVKKVMKSDGEKAKSPATGEKKRUVGEKTKKKPASGSS  
SPSKAKTTSEDSLAKTSSISESSPEKTSKIKTTAAKISKPGSEKAPRAS  
EECPPELSTEINSKNTSSESPVAKKTAKVTSKPTLELLSPIKSSPIKELD  
CEPVDTLKQQLSEQQLYPOGRNLISPVDDAPSDLFISDAEQLSDDDLA  
LGASASPTMLGPGYDYGAPTGDSDVEGVTGVTDPTSTIGTDDGTYPALSNF  
YRRKYGGDELRAWQRVNTTGADVFSSATTETEAEARQASLGPRGYVGLVN  
QAMTCYLNLSLLQALFMTPEFRNALYRWEFDNDNEAKNIPYQLQKLFNLQ  
TSPKAAVETDLTRSFGWDSTEAWQOHDIOELCRVMFDDALEHKFKNTKQA  
NLISNLYEGKMNDYVKCLECNTEKTREDTFLDIPLPVRPFGSSSAYGSIE  
EALRAFVQPETLDGNNQYLCEKCKKKCDAAHGLHFKSFPYILTTLHLKRF  
FDYQTMHRIKLNDRVTFPQTLNLNTFINRSGNSGEQNSQLNGTVDDCSTA  
DSGSAMEDNLSSGVVTTASSSQHENLNDDEDEGIDMSSSSTSKSAKQSG  
PYLYELFAIMIHSASGGHYAYIKDFDNNEWFCFNDQNVTSITQEDIQ  
RSFGGPNGSYSSAYTSSTNAYMLMYRQVDAKRNELVAKVADFPHEIKTL  
LPKLHSEETRVSRLGRHITVTDLALPDLYKPRVYFYNPSLKKMKITRVY  
VSQSFNINLVMSAYEMLNVEQFAPLSRCRLVAYNSSMDTIIQSLESCTD  
PALTELRAAQNYSLDFLLEYRAEDQEFEVYPPNGITWYVFKVDLSTMAM  
GPFLVYSAAREREASDVLRRSIALRLHISEQQFLLATVRATVPKAFVSYD  
PHPTPEALQHLQNMANTQFKSITYFYLNVPNTDAATLEMLGVPTVESVEC  
ASGGDVVDAAMMNGVAPGHMSSSNDYDWRRYKRDLVEPMSQPSPSHGHE  
NSEDSSLSGDRTLVETDNMAHRGGDSQVSSTSHSPQLSSPEDEAASHD  
AMMRVHAYCNGNGSYAAADVVDPLLLPTSTNHFFYATKVECVDVVGTGSS  
SGHQSDDEEAQLRKPTRAYKLLVGTMRMGAFKKHIEQLIQVPAAHFKLQR  
KHDNNLSNNQNNSLVHLIEGETLTVELGKTLEPDEFKAKIHFLRLADIDN  
ETSKLPCVCEWVYNANTTAEQAKKELVAKLHRIDAKYATLSVQNCRIWLK  
GGRIPIKILSDDETLYCDMRSSIAAEFIVQEEEEEVDPOPKDDSLTLFVR  
RWCPAKLEFGKFQEIITLDQDSEIRLSLSQISDIPIDKLSYMKLNSNFPCT  
SISALSVNESSSWYSVPTTLDKYPLNSTQTGNIYLYKDRTVPARELTLEE  
RRLMNAREKARLDRVGCVSTTRYAQRERRALKIYLDSPKSSNVTASAPM  
DVHVNN



MCEVCADFQNLLELYEVRVASSDLKFQLLKSEIETTFNYIQSWPQRCM  
CLYRDTKNYDRFNLVVQSLICLTVQHLKHIDHLIDNYKRLTASAAQVVAQ  
AQOQREQORDEASQAQAEAKESSAPAEKPKKEEPSGSAGEEAQSGDGP  
KPPVGPCTPPPPQTANPOHKSHLQYTEEPWILPEVEKLLVLVSKVFLNF  
PLYIAHKHGMHSRLDDLQAEAAHLLALICDLHDNDLPIYLLRNVSFLCNS  
GGFGAMSLCFEHPDLPVSTAHSMTAAVSNVKLWLNHYHCNTQLFVPLRSRI  
LQYMCKLSDQSLRSAATRAMADFWSSMRDPLDVAVNFDEGLALAFKYF  
TSTTLTMLAGMAQINAHINLFNEICTTETVNEVELFGQRIANWLTENHI  
VQHLFGPNLHVEIVKQAHVLLNFLAVENQISEEDIKLIWQATQLKHCSKT  
IFDILPSLVKNLTPRPAMHLYSLLCRMDPKHEEQSIYIASALTKQLWTR  
DTSRSQMNLMQDHLGNSVTASSSDSGSIEGSNTEDDHVGADDSSIASGG  
GGGGVGNKSPIDGVTCPKQARHRRHICDPTTEKQKQISPEDMAKVDLV  
RIVNIIDNTSSEEELQSRAALELQLHRSRKKTSNKRRRQKTNKQIILPHE  
LVEIWDGVEDVPSSDEADGEADGDGEGELLADSDECSGDGATSQLVPDAVL  
KHLQEGEFPFIRAIETNINELLSGAENDGSYSSPMSNKSEKNLADFDEEDV  
SPCEEELAQLVSSRANCSDVPPAFAAAAAAMMVAQSAMALQKSGESNVAA  
AAAAVAAAAAATGTAQOTLVAMNRQASVAAAAAVVAAAKAKSDSDVDLMD  
VVSQGGKQHHSPKASQGSSTSGSTPVQPSFKLNDVCQPGNTLLWDLLODDK  
IGQLGESLALAEKALATLLCFMSMDRQLRTKFIGCLYNVANRRSVIVSL  
RLLPKLFAFQOFRPSDTHSMTMWAERNHRMMQCFNNIRHYARRHAEVL  
ITQNGEQOQQOLGGQLYSHKTQVSVRLQFLSSIFSTVGSFKSFRLTLEQL  
DALWEWLAHDPECADCYFSWLQAQAKGGDQHALGIEALQHLYLKLP  
PEEFMVALGLFQQLCSFARIAMAEYDNHSDQISASASAVGMYHLWKIAL  
RAQSNVSLAAIQYINMYMGQQLRLEKEFVSQCMENLVQAATALESIDD  
ENALMRVQRGLLLNTHLDTFRRRYAFHLRRWAIEGKIGSHSNLKNEGA  
GPPLRIVLQOAGLSEKSLLOMHACDLIADLKAESKWWESLOTGLAAPVL  
GLLLSDGPLRIITQGOELTSDYDERSLGDAGFKDNQIVYVSLGGRGARRK  
ESNLEHPSMLPPPPKECLPTVLLLQPKYFEKLFCLMQTLGDMQPOASTVN  
POHHTKAQLLSRRVWDILAMLPTNPHILDFAFKSLVTDLSELEQLDAGGEE  
EQLATKRKQIKQKFRDLLDPNNLQKFMYSLHIVESLALTSRRGESNGNV  
AMGNTPEQVRVKKSSMGRRRNSNEQPPPPPEVKMSKEQLCELEAPLTP  
PSTGLQDVETEASSSSGGDKENQPKQHSKRQKKGETFEQEKERPVCSTP  
PSPTPPPPALSVVERGDNKWSEAFVKCGGLRHLYEIFSEGLOQSAHPKE  
LALNEWRHDCLASLLRILWLLGFEELOSADAHVLMRPHPFMLQLMEVPO  
CLTRLSSILNDEVHQHQASSANPLVFPYQFQHLRTGFWGRAQLIQFAMN  
ILVSFVHASAEARRLLWAPTGTDHCRWLQKFILEDPEPAVRREICAGLYR  
ICLGNHASYRLLLAPLLHKLIALLLPLAEQMSSGNQHTQFLLSEEGKDPYG  
PACRDYFWLLARLVDTLSPMVAEEHIDIEMLCESISQSILTREYYELRH  
GYQDDGLVGLLNLMSNLIKDYDTTFKYTPKALSFIGLIGFLDMPSPADR  
QKPKCKSASSRASAYDLLVELCRGCATNYAYLHGRLLAQHKSQPKOPYPW  
DYWPRDEGRAECGYVGLTNLGATCYMASCVQHLYMMPQARAVALRVPPNA  
ARKHGPTLLELQRMFAYLLESERKSYNPRSFQVYQMDHQPLNTGEQKDM  
AEFFIDLVSKLEDMPDLKHLVKRFLFCGSLSNVVSLLDCGHVSRTAEDFY  
TVRCQVADMRNLQESLDEVTVKDTLEGDNMYTCSQCGKKVRAEKRAFCK  
LPQILCFNTMRYTFNMVMTLKEKVNTHFSFPLRLNMCHYVEKTLMPQQYK  
EERERRQKEKEGADGSGDGNDEKAEATLDDDIIECYEYELVGVTVHTGT  
ADGGHYYSFIKERTKTSYHTHERWFLFNDAEVKPFDPQSQIAAECFGGEMT  
SKTYDSVTEKYLDFSEKTNMAYMLFYERRLPEHLQRRHSELLVTPTPSP  
TVEEKSEAEPTKMETSSSEIKADVDEVEVEEKDKEKPAQTDTESKETP  
AKEEIAADKSKQDEPEEKKIEKQSRGEEKSETDEKPTMTTVSTEEEEKQ  
PTANCDNHQONNSNSKASNDQOPSTSKAAQKLQFLRPLLNKELEDWIWQ  
DNRQFLQDRNIFEHTYFNFMWQICGHIPOSLISETDVTMAAKLSVSFFI  
ETFIHAKEKPTMVPWVVELLTKQFNASQEAQEWFLSHMSQEPYWPVQVLIQ  
CPNOMVROMEFORLVTHVTOQLPASHAHLVLEVEFTDEDDKFTJGQASCVTR

CG5794

**CG4165**

MVKKRQADSRDHDCSTDSGNEDLHHRKGLGSPGQSDGATPTTASCQHIKK  
AVDAARLRLLKSTGLLYECSQCQKLGKTAGSAAGAGASEGAVGPGGNPV  
TFEFDNTLWLCLKCGSQLCGRARHKHALEHYQTPHSDSHALAMNTRSFDI  
WCYECMDKICSNLRKNLLECVLKVKLAQKPPTSTVTPSTPTISYIEEKL  
KAALEHLTPIVPMTGGSFDDSSSRGSLAAAGGGGGVSSRNQVAIPMP  
PEPSSGLSTSDSLTSVPGMAKRIDQYSATTNGNTGNKRLLTLETPRIENE  
RLPRVRGLTNLGNTCFFNAVMOCLAQTPFLLSVLKELSEPGEFIFLPGGT  
FTIKDKGDIELPMIKGTLSSWGGLTAALANALEELOAGGSVFTPRKLFDR  
LCVKCPQFTGGDQHDHELLRQLLESVRNEDLKRYQRVILQNLGYKDQDV  
NSVSEEMRQKCKIYGNQAGDRILRPEQVFRGFLVSTLTCQDCHNVSSRHE  
YFLDMSLPVAVEKPPQRRKPSPELSLTSSSSSVTPSTGQPTINTKFTD  
GSVNFTASSPSFFLHAHEAASLGPSKSOVKKEKERQRKAKRAAKRQKSS  
LNLNGNDSGNGNELAESVDQDDASLASLGAGDQANDGLEQTNGQTEDST  
TSSVTTSEHSDADVEDNLVEDTAAPSTNNVPSSTASLTAPSKTYMDSNGN  
AOPPGEKRDDTPEHMDKDSLEEDENDSGIATSPAPTATNSSTSTSATGNN  
NSVAGSGLSGSSGALEDPLAPASLVTAGLSEKASVIRQVSVGAEQOGASN  
GTEDADGEAKAIEQPEKTPSOAQAMAQAQARTKRVRTQSYSDWSTTIAPR  
YQCEDEGCSVQSLNFTAVELMTGQNKVGCDSCTQRINGSDPKAKSVNT  
NATKQLLVSSPPAVLILHLKRFQLGPRCIFRKLTRPVSYPNLLDIAAFCG  
SKVKNLPNIDRKQKLLYALYGVVEHSGGMYGGHYTAYVKVRPKVAPGDK  
RWKFLPHGSKAELDQDDQLKKLEELLAKEKAREQHLKVLDDSDDFSNS  
SNSSTSDSQTPATPLEEQQTQQAQQPQQPQQLEEAANVRAPPKWKWYVVS  
DSRVQEVSEDTALKAQAYLLFYERIY

**CG7288**

MAQTQAPAAKRMKLEKTPANPVEEDETSPVFNPKYRVCPYLDITNRNLLD  
FDFEKLCSISLTRINVIYAACLVCQKQYFQGRGTNTHAYTHSVGEAHHVFLNL  
HTLRFYCLPDNYEIIDSSLDDIKYVLNPTFTTRQEISKLDQLQPKHSRTVD  
GVLVYLPVVGLNNIKANDYCNVVLHALSHVGPLRDYFLQKQSYAHVVRPP  
GDSVFTLVQRFGELMRKMWNPRNFKSHVSPHEMLQAVVLWSSKRFQITEQ  
GDPIDFLSWFLNTHRALKGNKHPNSSILYKIFLGEMKIYTRKMPPVELD  
DAAKAQLLATEEYKDQVEDKNFIYLTCDLPPPPLFTDEFRENIIPQVNL  
QLLSKFNGTAEKEYKTYKANFMKRFEITRLPQFIILYIKRFTKNTFFLEK  
NPTIVNFPKIHVDFGDILGMRQRDKDKTKYNLVANIVHDGDPKKGTYR  
AHILHKANGQWYEMQDLHVTEILPQMITLTESYIQIYERCPNSS

**CG7857**

MCDGDVAIAELESRLDEVSLDIGARHRRERKDLQAKLQAMKKNAPKNNK  
NKRKEFLEEMARLEGELEQRHKAELKAAEAMEAPVLEPVVKEPAEKPET  
EVTDDDIEEKEEQ LAPNQRVSKAQKRRDKKAKEARAREAEIKTELQNA  
NQPTPKLIELQOITAKLSQRQLSLHNIPSDGDCLYQSIRHQLIVNALPGH  
SVQELREETANYVRAHKDSLISYMIHPETGDILNDQOFEQYCHDIAKTHA  
WGGHIELKAISLLRVPIEVIQAEAGAPTLGQEEFFGGSPLIICYHRHIYQ  
LGAHYNSTVPAA

CG15817

MHEYDVNERKEEPASLPPTONETTEINSQLRQDQONQEQENPLRQODNSH  
PPQENP INQOEKDTLQVSVLYPLVVCAQLADSQVLVTADTPKLSPVKKRQ  
RRVYVADTLRCYSLRSRQEPATKDPLEGGLKQPDVVPPPPVQAPSPTPT  
ESTEYTPPEQFKSEFWNRIEEAQEPKPVGKKRRTPGGLKRTRGNKLLKEL  
EIQSPETA AAAIAAAQAE LNAAGKSGAAGARSSRKRTNTMSLYDRRFQTTT  
EERRVANGYGGNAARSVTGSSSNEIESQEPQSHQYYGPNNGGSNAAGAGAG  
LNGSAAALNHAPSMGTLCNIGNSCYLNSVVYTLRFAPHFHLNHLHHLIQDL  
NVVQOTIVRQOTARSASLGKNVSAAOLEHARSWSSKDLATSTDQYSGQNG  
GVNSGNGGSGSSKSTHQSVTEKLHELYNNLHGNEMADSTEPYHADTLLHA  
IQDVNATFEGNQQDAHEFLMCV LNCIRETNQSLIKAIGECPEVIANGYI  
ANPDEVDTGEGQDRDSTASQNLNAGNGSLATSQTTTTTKTSFFSRKSKRK  
DEVKPSKSTRVQSPLKENSPTAGGITGAGTAHATANS LFYLN TVDLSGAS  
STSGSASTSASGVVSTSAALPTPPQATKYSSDDEMNSATVLKDKMRLEER  
IRELNLNFFSSDFEGIVVLTTKCLSCETITRQKQGM LDISVPVPI SGYDN  
ADLQDKPSTYIQNSCITKEYFRGENKYSCNQCTGYTEAIRSISYEVLPRL  
LVIQLNRFSGGMEKVSTYVPTTFTLPCFCATCCELGEGNKLHVYKLYSVI  
THVGATLTVGHYIAYTCFLDLASDYVNC PKDRRNTMTNSQTMASQAVPSN  
ENAAPNNGSSSVASTPVIAAASALASSGNILMKMKFGRSKASSSGDMSK  
NVKQVNGIISK NITNGIGKLSISTTCQGVNCCAMRLCCTQOTSSSNSTSC  
SDFSEESLQNGSNSNLSFGGSGSTYPTGYGSTGRGGVRANYAHGGPDIW  
YMCDDDKIKAMTQREFEELLSPTRKITITPYLLFYARFDLQPKATPPMP  
GSSTTPPPSSAQSSWSNENVSSGSHKI

CG14619

MMLDIKKTRGFHKIPQASKLQSTTKTSSVVATSASSQNEVPSPGGSAGSK  
VGATNPVRAANQRFFLVSSYKDPTFLKAECDLAHAHVTTSKVKTTLQPHR  
RSRAGEDSRNNNYNTSRAPTLINMRRPSLFNGNQOPTTTNSTTINNTSR  
NTTSNTSNGVLKYSVRSTTATATSTSTRNYGK LKPLNNNQTTAGVAMNG  
HTNNNNNTRNSSNINNGGNMQRQQQHQDDISFIDSDDPPATGGPEAG  
ISTTKTSICYFKPITPPLQLRHEQNQVQOQEEQOPQSSSKSASHRYPRK  
STIIASAHSNFAASF EKFSGLYRQTNGETNIESKTSSNARRYGIDSLSI  
KASIEKFNNLSGQKRQNP GSGGIGPGSATASGLGGRLSVASRSNHGSQ  
AGGSSSNLQORYSSDLNIRVAAGYSSSLTRAA YRTTATMNSVSTPVAVT  
SELGGPISGDGGETATAMQOPTSKVTVRGAHSNRQPIECDSVVL TNKASK  
DATTAATPTVATATATHTPATSSVSTVTVTAAAPNSASDSTLARS GTGSS  
STARSVLPMTPTSSRYWDRDSGTSRSSIGTSSALNSSSLKHNSDDGYKT  
ASSSRDEKSEGLCGLRNIGNTCFMNSVIQCLSHTQELTRFLRSHHGSRSL  
STKDQQILHEFAKLIQEMWTANVHTVTPMELKRAFSTKHRMYS DYNQODA  
QEFLRFFLDSLH SALNSGVKGETLNIDDNLSDNKKADLTWEWYTRHENS L  
VRDLFVGQLKSTLKTTCGNTSVTFDPFDL SVPLPSSSRCKLEACLDLF  
IREEVLGD EMTCAKCKTRRKCTKSFTIQRFPKYLVIHLKRFSETRWSK  
LSNIVEFPTSDELNMGSYGANSNSNVHYSLYAISNHMGSTAGGHYVALC  
KHPVSRKWHEFNDNIVSDALSENHLVSSSAYILFYERT

CG8830

MAVKQNNSEAGDNASDNAGGAGNGIPPNAKPMSANGMANAEENVLPKGM  
TGSPAGESLNSNRSGKRDIKALLAYLQSIDMPEQGHNVMAICERVIVDLA  
RLQIPRGASCPRLKEDVCQVGAFLATRNEKFHQMFYLRVVEYLITKSPFE  
PPSCAVAIVFQFLDSTQILEAVHSLLEQNVQDSSIKKTVNLLCDWITYC  
TFCSTLNLWVLALLKGLRDQGMALLDEIAMDNIEKLFHVMIFPALRQKA  
APVVFHMLSTINQTPPEVFKILPRIPRVLQYVKNQSTTMDEIGLETKKCL  
QQLVDLTSALMLRFYDQDELYVATKKALQTYEPPNCVALAKAMHENAQP  
WGRRNARVGLVNLGNTCYMNSVLQALAMTSDFSRQILLIECNSVLLMKVQ  
QQIALMHSLRYELTPSRVLNATRPPSFTPGLOQDSSEFLGYLLDLLHEH  
EINSSSVTGHVSGPPKTGREVDDVPALLSEDILSSGVIPYNSKDHELSSG  
SNSDNCNHKPTPTPPATPTKATNGLKQOQOQVDQAKPPSTIDKTFAGKLS  
TTYRCLNCGWESRNEDSFRELQLSFPDDKEDCGATNYSVQDLIEYYCSPE  
KLDGDNQYFCPQCKKLCDAERHIGVTQAPKNLILTLKQFKYDQKYHFRTK  
LMHKVFHDESVTVKMSAKDSLQEMSTVHYDLYAGVVHAGYSMDSGHYFTF  
AADQAKNWKFNNDNVVTHSKPEEMHNLTSNPYILFYKMGHSNESNSV  
TASCSSSMVSGSNDQVVSPLSPPLKLEELPRRLRDYVRKDNHVYNEELK  
MORFKRGNHGFVSRHNFDDGDEDDKAPPPGGCGGNLGMNINRF  
VF

CG6091

MTIKPVSAPPSAKRVAGNVDPDNKEAQVVVVEQSVVSQTHNHANHRNVV  
IDGQSPQRRGEVYDELARTHRCSPHKSTRSKRREHHEAHALYKRDRLER  
EKLHVHTAAAGSGAPGVSGSKNSPPSTSTSGSSSPSAVGRNSPEHLGLG  
CTTVPTAQVQVQSTSTAAANLLKTVEETFSGYNSGDEHHQPKERLIPVEEW  
QRRDLEFAKMEQRGYELKPVEEDGACLFRSISLQIYGDEEMHDVIRQHT  
MDYIHENREYFGQFVTEINYSIQKRARDAHGNHIEIQAISEIYSRTVE  
VYCYQSNPINIFNSEQSQAGYPLRLSYQRGSHYNAILDYPYNATVGVGLG  
LAGYKPEIQTKAVRLSEOLEIEQTMFEDKLTDDWEATNEAIEEQIARE  
SYLQWCRENTQORSRNSNTAAGSATSTVTSAEALTDSDASPSKYSACGGT  
GSSGNPPVALTSGSGGDGAGPAFSLSPKTLNQFHKLPQEVNELGGYDSD  
ATDMSSTSSVGHSGGSSSPSTAASQSRGKGSQRRTALRKKRRHETRE  
TTLASKSAEALPLRKSPPKRSAPSVARADTPEAEQRPSTSKQSSHSPQ  
KNVDSKSPTEQSYSSFYQELLEASYANEGANESEMLQQA IQMSTRDYMED  
QKRKFLFGP

CG30421

MGTTKERREQSEGDAATTHLTTTATATTGAIVAAGVTTTLPATKTTTAA  
DTSTTNAAKKIRRTFSMPRNPFRWTRKFKTAVAVTSSAGAENDNESGKNN  
GARERRGSHTAISSCVGGGRGRSGSIVSLSSYEAPFISSTNNNTTASNG  
NNNNSSSNINSKRTRALRRSSFRKFLNRIAQHLSSTVNVVSEEKHPAN  
RIAFIEIVPFYTGWRRKEANKHGQPSVSGSSSGGGGAGGPGGGERVPP  
IGGYQWPADQTPGVMGLKNHGNTCFMNAVLQCLSHTDILAEYFVLDQYKA  
DLKRRNKINSRKFGTKGELTEQLANVLKALWTCKNESDHSTSFKAVVDY  
GTQFRSSTQHDAQEFLFWLLDKVHEDLNTASKRRYKSLKNSYGRSDEVIA  
AETLANHIRCNNSFVQAVFQAQFRSSLTCPRCEKQSNFTDPFHCISVQLP  
QLTQQTIFVTVVYMLRTRLPQVRMGLRVPAGSPIVALREQLQADTGIEGSR  
MVLVDLNAEGFTRVIFYDTQPVELSSIETIYCI EVPAAATPVAKAATPSET  
GDKSAPTAVTPSPAAAQSQADLLLLVANVYRAKDGADITRFGAPFSMKAP  
RDCSYQDLQKRMLREMAPLLKPEVFSYATPLAEMFRIRLQDPSADPD TYL  
EQVEHPLLTEMIDMALSVLSSEAGPQHIKLLLEWSSPEAHFISKQODTEE  
AVVEHESVARLSASKPSDTAALTLEQCLEHYTKAETLSAEDAWRCPHCQQ  
YLPVVKTLGLWSLPDILVVHFKRFRQHOSKGPQAAKLTTMVKFPLTAFDM  
SPHLARGVHESASSSLGMGTGIGLGLGSGSNPWKKARSVDSRSSTLNSRC  
DAKDTRYDLYAVCYHQD TLETGHYTAACKNPYDRQWYKFDDQRVSKVPE  
DDIEQDIINNEAYMLFYQRRSVDAGECSGSSNSGDHWVSRIAPASSSSA  
SSTSGKEREVPKLEENTESPAAVEVTEKAQSKPVDIVCQDKAKGTADGPD  
ADQEQTTVPHDLQIEELAFADADVDTSLGETIKAEVNLA AKDEPKKVEVE  
EATPIFAMDEDGSEARQEKKEECVKKEDELSEAPDVSELTAESKTNGHVS  
SSSSSSSESSLSSRSPRSLSTSVTAASTLQSKFNHMSAAPALFNGNG  
NTSQLSSSLQLSRHVLHNHQWHGSRSSVSAVENATQHQQQAAAASLSLRH  
SFSTSSNYTETLSSLLRKSANTCSKDTLLFIDQQSHHHTAGLIEDDDDSY  
MGRSLWISPVTPHKLITVSPKN

MTFDTRRHTTGQPGSTAPSSSSSTTSTTTTTTSPAQSAGSGSGIGTGTGT  
VANSSLPGGGSGSLDGNQDQOPATDSQSSDDVAASLSANSVDSTITIVPP  
EKLISSFP'TTKLRSLTQKISNPRWVVPVLPEQELEVLLNAAIELTQAGVD  
HDCEPCVEFYRNLSTSFAKILTDEAVNSWKNNIHHCILVSCGKLLHLIA  
IHMQRDNPYLLDLLAIVFDPENKFNTFNAGRQPECFAAPDYIWGOLDSNK  
MYARPPPEPKNARGWLVDLINRFGQLGGFDNLLERFNIGLELLKRNQKNC  
TGKNISVEGRVENGAQDNRLTLALIHSLLRPFQCYELLMPATIAKYFMP  
TWNVVLDLLDSFTDEELKREVKPEGRNDYINGIVKSARLLASRLTGQOEE  
IRDLEMFRLKMILRLLQVSSFNGKMNALNEINKVLSSVAYFSHRSOPLPH  
CMPEDMDWLTADRMAQWIKSSDVLGVVLKDSLHQPQYVEKLEKIIRFLI  
KEQALTLDDLDVWRAQAGKHEAIVKNVHDLAKLAWDFTPEQDLHLFEA  
FQASMTTANKRQERLELIRRLAEDDKNGVMAQKVLKLFWTLAHSQVEP  
PEVLDQALGAHVKILDYSCSQERDAQKTIWLDKCVDELKSGDGWVLPALR  
LIRDICCLYD'TTNHAQRTQTSTNRQOVIERLQNDYSLVILVTNSLTAYM  
EKVRQMVTDSPGLDATRILIDGRFPHHVQIAERLEFLKFLKDGQWLCA  
DQAKQIWHCLAVNAVFPADREECFRWFGKLMGEEPDLDPGINKDFFENNI  
LQLDPHLLTESGIKCFERFFKAVNSKEDKLKAIHRGYMLDNEDLIGKDYL  
WRVIT'TGEEIASKAIDLLKEVSTALGPRLQENIAEFHEMFIGECCSRLR  
THYGNIVILGKTQLQEELDAPDQSDNTNDESKDSKMRFIEAEKMCRIKLV  
LQEYVKECDRSFSGDRVHLPLSRVTRGKNTILYIRFQNPGRSIDDMEIVT  
HSNETMAAFKRNLKRIKGTSTANIKVDLFYANDEMIGVSEINPLYQYT  
IRDKMNL'TAKLTPVGTGLASSPDS'SSDSSTGSPRPPCPDMQORVESESTLP  
GVIISQNYQYTEFFL'KLYQLGSDLEHGRLRDSAKVLLHLLPCDRQTI'RQL  
KIMCKVPKAAVTVAVTGDKIAKDEEEKLYPTEQAGIEDEEEHCTPEQMFL  
HPTPAQVLYNLSVLHGLLIPALDPLGESALLVQSAMHSGCAHFVLELLT  
KNNFLPSADMHTKRASFQCVLRLAKLFLYIVGSVLSRVGDEPMICDLNG  
SRSQVDILKQNFSTMPSSSQGTLRAISAKLAVILAREMLSASPEGDRCRT  
LFSSTLQWSCPDI'STIKAVVOLAWASSCGNLQALGNSSGDFEDEVIVPDG  
QDFSMCKEAELEVL'TISFILNPSANEALTS'DPNWPKFITSIVLKNPLRHVR  
QVASEQLFLASTY'CAGDRRPFVYMVNLLVGALKTLVPQYESTCAEFFSVL  
CRTLSYGC'IYNWPLQISEGLLGDEIKWLQRIRENVHATGDTQVHEELLEG  
HLCLAKELMFFLGADSKAQLNELIHELIDDFL'TASREFLHLRRHGSLRQ  
DTVPPPVC'RSPTIAAACDLLIALCQLCVPNMKLLTNTLIDFVCTD'TDPL  
REW'DYLPV'GARPTKGF'CGLNAGATCYMNSVLQOLYMPAVRVGILRAH  
GAATTDGEDFSGSDLTGGGLGSALFSGPASALVSLPSSSSTIEDGLHDV  
RKNYHVVILKHVQAI'FAHLGHSALQYYVPRGLWTHFKLLGEPVNLREQQD  
AVEFFMSLLESLDEGLKALGQPQLMNATLGGSFSDQKICQECPHRYSKEE  
PFSVFSVDIRNHSSL'TESLEQYVKGELLE'GADAYHCDKCDKVVTVKRV  
VKKLPVLAIQ'LRFEYDYERVCAIKFNDYFEP'PRILDMEPYTVSGLAKL  
EGEVVEVGDNCQ'TNVETTKYELTGIVVHSGQASGGHYFSYILSKNPANGK  
CQWYKFD'DGEVTECKMHEDEEMKAECFGGEYMGETYDNNL'KRMQYRRQKR  
W'NAYMLFYTRCDQTPVQYEPSVEQLSLAESRNMVLP'PKPIERSVRHQ  
IRFLHSRSIFSVEFFNF'IKKLVSCNLLSARSNKITPAAEEL'SLLGVQLAS  
QFLFHTGFRT'KSLRGPVMEWYDALSHHIRSSALVRKWFANHALLSPPSR  
LGEYILMAPSPDVRTV'FVKLVVFFCHFAINDEPLTGYDGANLCEQVLISV  
LRLKSEAADY'GKHLPHYFSLFSMYVGLGTREKQQLLRLNVPLQF'IOVAL  
DDGPGPAIKYQYPEF'SKLHQVVSHLIRCS'DVSEKQSSNQARPLSNPFK  
DPNVAHEELT'PLSTECMDLLFNRTGYIKKVI'EDTNVGD'EGLLQYCSWE  
NPHFSRAVLTELLWQCGFAYCHDMRHHTD'LLNILLIDDSWQHHR'IHNA  
NGVAEEREGLLETIQ'RAKTHYQKRAYQIIKCLTQ'LFHKSPIALQMLHTNS  
NITRHSIAVEWLQ'GELDRQ'RGIGCOYNSYSWSPPAQSN'DNTNGYMLERS  
QSAKNTWSMAFELCPDEVSEKT'DENNEPNLETNMDENKSEPVAQPGGVLE  
GSTGGTEQLPENKTP'TTSSPSTA'AWPARGDSNAIPRLSRQLFGAYTSTGS  
GSTSGGSAPT'ALSALTTAGSGANSETESSAQ'ETTGETTINGL'TNSLDQMEI  
TAKKKCRRV'IIKKLVESKDEEDAT'TATTAATTEVTTSPATAIATAATLEP

CG1945

**CG32479**

MASTSSSASTTAGSSGAAGGGAATPISTPSTPQPSGVSSGPGNNGNNNNN  
HHNNTLVSPSGNNNLMTVPVQAFPTPTGQPVYNPPVYMSAHGGHPHAGAHYP  
AMIPAPMPSNHVYVNNVTANVNLHGWPBGVPAYMPPGGQHYYIGHGDMPO  
EQGNTVMPHLQVPV PINLAPQGGSPNPHGPRMGGGRMRERGRPRGGGPRRN  
DYHGPRHLQOQQLITLPPQOQLPPPDPGANPGLQLQPDQIGQQLAPPEAHM  
QHLOQYAAAPPTYAYGPYSPYFPTQHANVQPPNATAAQATGTPLFIS  
GPLMYNPAWFNHGGYIYPMHPAEYQYVPELAGQPGVDERGAQPDGGMTO  
IWHQGPYAEDEFALQOQOQOQOQVAVHPNGGAVSVADELNHNSSSLPSSE  
TSSMISPNIPIYDPQMHMQHMGMQIFDDGQMAALQPIHPGAGPLPQY  
EDELAEAGAPPPGPIPVAWTAAMPLPPDAVQFALLPPPPHHILOQTSPLL  
IEQPAQLVQAQPPQPPTPTPQOQOQOQHQEQTADKSLTONNEVVALDEK  
LANEKQOQIDFHQOQOQEQOQOQOQOQOQOQLHPLAQOQOQEEQOQPQOQLO  
PLQTEKPTTKVNLVAVATVAPQLQOPPLQOQOQOQTSPPVVVSPKQOQOQS  
QAAHQNSYHDQHPLPQOQOPOQOQOPORPKPSOQYNQAQOQOQVRRKYSSE  
YNHHHHQHGSSTGTGIQTTKTMSWTNSAQHKKSTQSVSVTASPNSVNNNGPG  
VGAAGKANYSHTTKFTFTNQOQHYQOQHYHTQNSYNNNSSGGGSSSNSSSSS  
SNNQPOVRNYGTMKMPSSPVAWTAPTPERKNSQAAAAAPAAATASAAPVA  
ITTVTTSTASITATPNQFQPETGSSSASPAAAAQOQOQPAQOQHAQAAQT  
GAAAAPSKSHSNYASSKKHQSYEPVVLSSVVATSSSANPQPQLNLAPPAP  
PASQNSDSSQLSWASLFASNKPVAKVAPYEASKIAOQOQPSHPVLQLAPP  
QPAQVAAAAPVAQLSSPPQNLPLPTAHQOSQLPAPVPAPTAPLVTPGALS  
YSAASAQAVPASPASASVKPLKPEPRPVQOQLEWTSKYAEYLTRHKT  
NLASISLRPRGLTNRSNYCYINSILOALLGCSPFYNLLRSIPKQAAVLSE  
VKTPVTNAMMSFMTNFSSLSGLRLRLNLLNKGSKGKDDFVGSDLQCD  
MAFEPTEIYKLWNSREEHVEGRQEDAEFLGYVLNKLNDMELVIKLI  
KPTPQONGQEPAPEDGGDVWQMICNNRNKGSVTRQTDGRTPVSDIFRG  
ELRSRLQREGESTDVIQPFFTLQLNIEKAASVKEALEILVGRDQLEGVT  
GSKTKQEVVAWQOMTLEKLPVVLILHLKYFDYRSDGCTKILKKVDFPVEL  
KIDAKILGSKKTSQKQRAYRLFVAVYHDGKEASKGHYITDVFHTGYSSWL  
RYDDSSVKPVSEKHVLQPHTPRVYLLYRRSDTLPPQOQOQTOQOQNGGGS  
GGVVGSSSSSNAGDNK

**CG4166**

MSETGCRHYQSIVKEHSYDTRVIDAYFAACVNRDARERKAIHCNCFECG  
SYGIQLYACLHCIYFGCRGAHITSHLRSKKNVALELSHGTYCYACRDF  
IYDARSREYALINRKLEAKDLQSIGWVPWVPTTKETNLLLANARRRLVR  
PNQITIGLRGLLNLGATCFMNCIVQALVHTPLLSDYFMSDRHDCGSKSSHK  
CLVCEVSRLFQEFYSGSRSPSLHRLHLIWNHAKHLAGYEQODAHEFFI  
ATLDVLRHRCVKAKAEHESKSNSSGSGSGTNSNSSSSSHCYQCNCIIDQ  
IFTGMLQSDVVCQACNGVSTTYDPFWDISLDLGETTTHGGVTPKTLIDCL  
ERYTRAHGLGSAKIKCSTCKSYQESTKQFSLRTLPSVVSFHLKRFEHSA  
LIDRKISSFIQFPVEFDMTPFMSEKKNAYGDFRFSLYAVVNHVGTIDTGH  
YTAYVRHQKDTWVKCDDHVIITMASLKQVLDSEGYLLFYHKNVLEYE

**CG8232**

MDYVYCGTDPIGASEDILSVYDAGSAPGNHGFSPSFNGFNIGTTDPEYVE  
LVPVLADGGEHFGVSSVAFDDYEELLWGMNQGGHVTSYYTNSMQKYTSFQ  
VHATDIVRDI STLDSGVLALTQ TSLRHQIRRGLPKFTFKSNMKEMVSML  
QLSPHRLVMAGLQDELIDFLRLTKETRIEHVGAGGCTVLRKNSRYLFIG  
DQLGTVTLRDLNLSVQHTIKTHTNILSDFSVQGNLLISCGYSGRQNNLA  
IDRFLMVYDLRMLRLI APIQVMIDPQMLKFLPSLTSQLAVVSSYGQVQLV  
DTVELSEPRVSMYQINTNGSQCLSFDISSSSQAMAFGDQSGHINMIAAVQ  
TPQPQFNLYSRSTEFADVVPQLPMVSITDTNFP LSSVMLPHLTTGTQWFS  
DWPEELLRYRYHRPKTIDPEVLSNMKMOGPIGYSPNPRRTARRNQIPYVIE  
QGGVCSPNGNGTAAATKAENGVKII PRRYRKVELKYTKLGTQDFDFDQHN  
QTCFAGLEATLPNSYCNAMLQILYFTDALRVKLLHSCIKEFCLSCELGF  
LFNMLDKSTASSPCQASNFLRSFRTPVPEASALGLILTDRSSNVNLISLIQ  
NWNRFILHQMHYEIFDSSKNASTYSGSVQTSSTNAENAGSSETSGSSDLYD  
SISDENSKEDDRERSKINAETDISKIFGTKQICINRCIKCQEEKIKESIL  
LACNLSYPNHIKSDSDQYFNFGTILKRSLSSSEKSIQAF CERCCKKFSPTNQS  
VKVTS LQPILSINCGLNNEKDITFLKRQLNRCSEKTTVDAAASLSTSKPC  
RYGANCSRSDCHFMPDRKSPSHTSQPNAVNNSPNGRQKSWFPLTFTMGI  
NDQGEVQVQTSQSDASSGKSEQEEETEKPPTKGLDNNRMYALHAVVCQVDD  
GTQKNLVSLINVQRPYHTMKLAESADDPQSQWYIFNDFSISPVSPOESVW  
FTLDWKVPCILFYRHVEDDSESASTTSSTVTESEETIPSESSSGSPTNLS  
NPFLEEIVSPMLGNLSADATLQPLQSDEMPQSGDLVAMDAEFVTLNPEEN  
EIRPDGKTATIKPCHMSVARISCIRGQGAEGVPMDDYISTQEKVVDYL  
TQFSGIKPGDL DANF SKRRLTALKYSYQKLKYLVDVGVI FVGHGLKNDFR  
VINIYVPSEQIIDTVHLFHMPPHRMVSLRFLAWHFLGTKIQSETHDSIED  
ARTTLQLYKHYLKLQEEKKFANALKNLYERGKQLQWKVPED



CG2904

MIKFRYKRKEPTNVVGVAAPTAGAAALGSGASSTPGTSPTSPVSVVPVQ  
AHHPHPQLGHLISNNGGTLPRSSPRKLILDGADKSATLTRQOSKOKSVSA  
LAKVASSVELAVMGYNSTGNNGNSNGHINSAGNSERDRGINAVIELFQQLQ  
TSSEPALCPEPLRRALASGPLAGRRFPLGCLGDAEFCFELLHRVHSHIS  
PDDGDSCESSACIAHRRFAMRVIEQSVCKCGANSEQLPFTQMVHYVSASA  
LTSQKSLALQSHQQLSFGQLLRAAGNMGDIRDCPNTCGAKIGICRALLNR  
PEVVSIGIVWDSERPAADQVHAVLKAVGTSLRLGDVVFHQVSEPRWAQQQTQ  
HELVGIVSYYGKHYTTFFFHTKLKVVVYFDDANVKEVGPSEWEGVVDKCSR  
GRYQPLLLLYAVPQQPTVGNVGVIGHVDVAMPASAPSIAGSVVRRAVTPS  
PEKPSLGNTRRAITPTPLRTPNDYQNLQSVIQKNIFPSNLAMGTDETDAY  
ISRKTVEHVLSAQYQNLQSVIQDKIGGGNGVGVGQQSVDKDGGFLSRKPIE  
AVLSAQLARRQHLQLQRSHSAESSSGHASSNGSSPPSDGLTMPEHLNQPR  
RRDSGNWSGDRNSASSASSTLDNPYLYMVAKRGVAAVPOSPTRHGLPYD  
PGYDSFSLSSSTDSYPPKHALNPQLAKIPEAAMGVVPPNGGAMPHGHGNGQL  
ALSGDCEKLCHEADQLEKSRLEESHDLLETALVLCNAAAGRARAAMDAP  
YSNPHTMTFARMKHNTCVMRARS LHRRILVEKGAETEAMPELKHMRGREGST  
SSVKHVRQNSKDRTELEKEQQQLQFQQIQQIQQIQQIQQIQQIPASIEIYATL  
PKRKSPKALASASACDDNAIEYEQEKQLATSPGKPERESRSLFGRKDKE  
KEKRSRSEDNRKLTREFTSLTETLLVNAKDTLKKHKEDKDEKKEKDKSGKK  
QHKIRRKLLMGGLIRKNRSMPLTEAVDDSTANAGITHHPHYPAQGVTT  
AGTLLGTSVDDSAVGLGKHGHGMSGYISEGHFDYSGSGSASNSGAGSNPN  
PNLERSKLMRKSFHGSGRQLTMVPKVAPPPMRTSSTLTPQQQQQQQQQF  
HHEANLSNLSAMSNTSISESDCQTIITTCQVHSEQSPLKDLQMLVAQD  
ELPLPPMELPPYPSPPHSSCHSRQASEDFPPPPPELDLEPLNQQLSQL  
QALEAASKQQRQQLSLEGTTSILAQLQQRQHLLKLRKEQANHPGAATD  
ATWLKELQAKQANDLRAMQRKLEASSPSSVRDLTHRFEQTSIRSYASQEL  
LSQPQGSQQLGQLRTQMNGLPNGNAKMDVDEVDAMPVRNSLPAALSAHQ  
LLPKPKYEMTQSQIAEEIREVELLNTMVQQTLNQNGAAALPKRVKKKSVS  
FCDQVILVATAGNEEDDDFI PNPILERVLRTAQHPNEKVTAQMIQQQQQN  
MMRLQTEAQPROQQVQQLQOPSPMLGRPAGATADMORYVQRMQQQQQQQQ  
QQQQQQQQQQQQQQQQQQQQQQQQQQQQHQELYRQQQLHRTSMGSIASQHL  
QQLDAQYTTMPRPLHHSQLGYSVTLQKHQQLQQQQQQQQQQQAPQQLSL  
GYFSNGSVATSEQVPLPSPYQRVPLPHGYQPAAAGPYYPPLPNAQQHLQQQ  
QLMAKPVQKKVSFEPGTKGEADCLPPPPPPQKNGLPETGSAGSGHPGAA  
PGASGAGGTTAGITAIPTRVYNNAIVKASAKAVECNLCRKRHVIAPAVY  
CTNCEYYLQMLNQR

**CG12743**

MDMQVQRPITSGSRQAPDPYDQYLESRGLYRKHTARDASSLFRVIAEQMY  
DTQMLHYEIRLECVRFMTLKRRIFEKEIPGDFDSYMQDMSKPKTYGTMT  
LRAMSCLYRRNVILYEPYNMGTSVVFNRRYAENFRVFFNNENHFDSVYDV  
EYIERAAICQSIQAFKLLYQKLFKLPDVSFAVEIMLHPHTFNWDRFNVEFD  
DKGYMVRIHCTDGRVFKLDLPGDTNCILENYKLCNFHSTNGNQ SINARKG  
GRLEIKNQEERKASGSSGHEPNDLLPMCPNRLESCVRQLLDDGISPFYK  
VAKSMDPYMYRNIEFDCWNDMRKEAKLYNVYINDYNFKVGAACKVELPNE  
TEMYTCHVQONISKDKNYCHVFFVERIGKEIVVPYESLHPLPPDEYRPSLP  
FRYHRQMPRLPLPKYAGKANKSSKWKKNKLFEMDQYFEHSKCDLMPYMPV  
DNCYQGVHIQDDEQRDNDPEQNDQNPTEQRDREEPQAQKQHQRTKASR  
VQPONSSSSQNOEVSQSAAPPPTQYMNYPVMI PSRPGHLPPPWPASPMAI  
AEEFPFPI SGTPHPPPTEGCVYMPFGGYGPPPPGAVALSGPHPFMPLPSP  
PLNVTGIGEP RRS LHPNGEDLPVDMVTLRYFYNMGVDLHWRMSHHTPDE  
LGMFGYHQONNTDQQAGRTVVIGATEDNLTAVESTPPPSPEVANATEQSP  
LEKSAYAKRNLNSVKVRGKRPEQLQDIKDSLGPAAFLPTPTPSPSSNGSQ  
FSFYTTSPPHHLITPPRLLQPPPPPIFYHKAGPPQLGGAAQGOTPYAW  
GMPAPVVSPIEVINNYNMDPSAQPOQQQPATLQAPLSVQSOPA AVYAAT  
RHH

**CG14884**

MDSDAAQKTWELENNIQTLPSCDEIFRYDAEQQRQIIDAKPWEKDPHFFK  
DIKISALALLKMMVHARSGGTLEVMGLMLGKVEDNTMIVMDAFALPVEGT  
ETRVNAQAQAYEYMTAYMEAAKEVGRMEHAVGWYHSHPGYGCWLSGIDVS  
TQMLNQTYQEPFVAIVVDPVRTVSAGKVCLGAFRTYPKGYKPPNEEPSEY  
QTIPLNKIEDFGVHCKQYYPLEISYFKSALDRLLDSLWNKYWVNTLGSS  
GLLTNTEYTTGQIMDLSEKLEQSENFLGRGTDVNEKRSEDKLSKATRDCS  
RSTIELIHGLMAQIVKDKLFNKVGLGK

**CG9124**

MANRANRHAARTEDSDNTINYVQCDGLAVMKMKHCHEESSNMDLAQ GAL  
LGLVVDKCLEITNCFPPKSGDETMDEEMYQLTVMRRLRRVNDHLHVW  
YQSSDVGNLSMALLESOYHYQTSIEESVVVYDQKSSRGFLCCKAYRL  
TPQAIQMYKDGDFTPFAFRTLKVGYENLFAEIPIVIKNSPLTNIMMSELN  
ELLPEDKGNFLDLGTATVLENQMRSLIERVDELYQEAVRYNKYQQVVF  
QDTEKHRALAKLAAENAVRTSKGEPTVPEEEVIKQFRPMTAPNRLTATIT  
SGQINTHAQHIAQFCSQSLAKLFITESLQIAKEAKETK

CG8877

MSIPPYMI PQNAWAAQLMAQQAYAAAHAQQAQLHAQQOMANQIQOIPPPG  
APLPPAGGHTNGIPIPVGGQGPGLGOIPTPKPDILTEEKLOEKALKWQHL  
QSKRFAEKRFKGFVDTQKEDMPPEHIRKIIRDHGDMTSRKYRHDKRVYLG  
ALKYMPHAVLKLLENMPMPWEQIRDVQVLYHITGAITFVNEIPWVIEPVY  
IAQWGTWIMMRREKRDRRHFKRMRFPFDDDEEPLDYADNVLDVEPLEA  
IQIELDNEDNAVYKWFYDHRPLVDTQFVNGTTYRKWNLSLPQLATLYRL  
ANQLLTDLVDNFFYLFDPKSFFTAKALNMAIPGGPKFEPLIKDHNVDGE  
DWNFEFNDINKVIIRQPIRTEYRIAFPYLYNNMPHFVHLSWYHTPNVVYIK  
TEDPDLPAFYFDPLINPISHRNANSKIQEPLPDDDEDFTLPDDVQPFLOD  
TPLYTDNTANGIALWAPRPFNMRSGRSRAIDVPLVKCWYKEHCPPGHP  
VKVRVSYQKLLKYVVLNALKHRKPKPKQKKRYLFRSFKATKFFQTTLDWV  
EAGLQVCRQGYNMLNLLIHRKNLNYLHLDYFNKPKVKTLTTKERKKSFR  
GNAFHLCREILRLTKLIIDSHVQYRLNNVDAFQLADGLQYIFAHVGQLTG  
MYRYKYKLMRQIRMCKDLKHLIYYRFNTGPVKGKPGCGFWAPGWRVWLF  
MRGITPLLERWLGNLLSRQFEGRHSKGVAKTVTKQRVESHFDLELRASVM  
HDIVDMMEGKIQONKARTILOHLSEAWRCWKANIPWKVPGLPPIPIENMIL  
RYVKMKADWWTNTAHYNRERIRRGATVDKTVCKKNLGRLTRLYLKAEQER  
QHNYLKDGPYISPEEAVAIYTTTVHWLESRRFAPIPFPPLSYKHDTKLLI  
LALERLKEAYSVKSRNLNQSOREELGLIEQAYDNPHEALSRIKRHLLTQRA  
FKEVGI EFMDLYSHLIPVYEVEPLEKITDAYLDQYLWYEADKRRLFPPI  
KPSDTEPPPLLAYKWCQGINNLQDWDVGECECNVLESRFKLYEKIDL  
TLLNRLRLRIVDHNIADYMTAKNNVINYKDMNHTNSYGIIRGLQFSSFI  
TQYYGLVLDLLVLGLHRSEMAGPPQMPNDFLTFQDVTVETAHPIRLYCR  
YVDRIHLFFRFSAEAEARDLIQRYLTHEPDPNNENIVGYNNKCCWPRDARM  
RLMKHDVNLGRAVFWDIKNRLLPRSVTTIGWESTFVSVYSKDNPNLLFNMS  
GFECRILPKCRTQNEEFTHRDRGVWNLQNEITKERTAQCFLRVDDDES LGRF  
HNRVRQILMASGSTTFTKIVNKWNTALIGLMTYFREAVVNTQELLDLLVK  
CENKIQTRIKIGLNSKMPSRFPVVFYTPKELGGLGMLSMGHVLIPOSDL  
RWSKQTDVGI THFRSGMSHDEDQLIPNLYRYIQPWESEFIDSQRVWAEYA  
LKRQEANAQNRRLTLEDLEDSDWRGIPRINTLQKDRHTLAYDKGWRIRT  
EFKQYQVLKQNPFWWTHQRHDGKLNWLNNYRTDMIQALGGVEGILEHTLF  
KGYFFPTWEGLFWEKASGFEE SMK YKLTNAQRSGLNQIPNRRFTLWWS  
TINRANVYVGFQVQDLTGIFMHGKIPTLKISLIQIFRAHLWQKI HESIV  
MDLCQVFDQELDALEIETVQKETIHPKSYKMNSSCADILLFPAYKWNVS  
RPSLLADTKDMDNTTQKYWLDIQLRWGDYDSDHVERYARAKFLDYTTD  
NMSIYPSPTGVLIAIDLAYNLHSAYGNWFPGCKTLIQOAMAKIMKANPAL  
YVLRERIRKALQLYSSEPTPEPYLSSQNYGELFSNQI IWFVDDTNVYRVTI  
HKTFEGNLTTPKINGAIFIFNPRTGQLFLKIIHTSVWAGQKRLGQLAKWK  
TAE EVAALIRSLPVEEQPKQIIVTRKGMLDPLEVHLLDFPNIVIKGSELQ  
LPFQACLKVEKFGDLILKATEPQMVLFNLYDDWLKTISSYTAFSRLILIL  
RALHVNTERTKIILKPKDTTITEAHHIWPTLTDEEWIKVEVQLKDLILAD  
YGKKNVNVASLTQSEIRDIILGMEISAPSAQRQOIAEIEKQTKEQNQLT  
ATTTTRTNKHGDEIITSTTSNYETQTFSSKTEWRVRAISATNLHLRTNHI  
YVSSDDIKETGYTYILPKNILKKFVTISDLRAQIAGYLYGVSPDPNPQVK  
EIRCIVMPPQWGTHQ TINLPNTLPTHQYLKDMEPLGWIHTQPNELPQLSP  
QDITTHAKIMQENSNDGKTIIVITCSFTPGSCSLTAYKLTSPGF EWGSK  
NTDKGNPKGYLPSHYERVQMLLSNKFLGFFMVAQSSWNYNFMGVRHDP  
NMKYELQLANPKEFYHELHRTSHFLLFSNLEDGGDGAGADREDVYA

CG4751

MENGVEHGVDES GENQVLSSSDGEGDCDGDGEVEGEVLQPPPPPPLQITN  
DCVGEVQAEGERAPATTGAVDVTPDPGPPPTDGAAPVAILEDNMCDKD  
VDS DAGEDNDDETKENYEGFN GTGRVTLQTLMAANVLQ PGLGLMTIEY  
LGQKFVGDLLADGKIKSHETETIFLTPSAWAMHCKRIINPDK KSGCGWAS  
VKYKGGKLDAYKNTYLKRCALQKETPLDDCE LDAERKTDTP EIVVKRTVF  
AHNTVSNRN VVHDANMLIESVPFTSVGK LQPF LITVNSSALLADFHCHL  
TVREVCYLG GTWDMNTH TLSITKTYPCRSTRFDRQRAGEVERDIQKMMI  
QDQLLLV GWYHSHPKFQAEPTLRDCDAQLDYQIKMRGASDLTYTPCVSLI  
ISPYDENPTLESVVKCIWIVPPNENRQSMEYGRPMLMQYSVLPDKEIPE  
EVRSEIQLCVDYYSQYRSEMVKFRNIYNNDV TYNEKLNKNTLYPKFPSKQS  
DKALWNWICAVLDCEQEDDFIPPKTIKIIDNDDLEVKEEDKPVV LMDLSG  
DVKINPPKEEQFSEAMGGLED SGRKAEESNAQAEQKASELKVM SLQEQ  
CMP SGLNMNPVRMLSPLATPNPTSLPPVLPNLGAPVLPATPSQLLPPQVP  
AVTAPPAITPAVTT SALT SALNASPRDSPITIQSNSASPAKFEVPVRASP  
SPAKSDTSSHASTSRTRNSPAPSPGKFSVSDIARNSPSITPNKYEA AAAAA  
LVPPAAACLPTANDLMAASLAQLAGQLPPNFLOGDLAALFQQQRKDYGSS  
SLNQLAAAAAKVGGSKQSNASASSGLNDPNVAAVAAYSNSFNMP LPTGV  
GIGGSGNSNAHSSSKSKSERSSKSSSSSSSSNSSTSN SYKTKLMKELDE  
LKN DPLKMSELIRSPEYAALLLQQA EALGATTLGTLGFGSDYSYLTGAGL  
GVPAANALTGGQSSNSSSSKSSKSSPAAAAAALSADYNNLIQASKLLGY  
DSYMQQSKQSN DLNAFLQQQMAVAAASIPPPPQTASSGSSNSSSSSKQQQ  
LQQQQHQQQQQQQQAAAQADYTALLQTYTKL FDPNNQFAAAMSSNKHM  
AGAHNELSALLSSGVGVGGGASGGGSKQKQKDIQSDMLNQLLQLEKQDSE  
IKALLYRQNKAAADLDALFATPSGAVVGAGSSANAMKSGSSAGNSGVSGM  
SSPSSLSNQAAAYNALAQEKMQDYAAFFQQQH GKYGIPDPLSKTTLAANN  
MFMTPSALFKIQQESLSAMMMKPPKSTTPSSARTRESSAS PALERLTPTK  
SASSGGSGGGGSSNSNSGGKYNFSAVDLAISSVPSNTPSPAPSDGSSGSSH  
RRSPDIGRLYGELAPPGALLGSGGVPKRMEFASVADLAAPPPAKMPKN  
NMGDDILNLSHD
