# Supplementary material
Source: publisher figshare collection journal article supplement (https://plos.figshare.com/articles/dataset/_/121057)
Supplement: Supplementary file [file 1]

**SUPPLEMENTAL FILE 3**

| Fly Gene Identifier       | Forward                    | Reverse                     |
|---------------------------|----------------------------|-----------------------------|
| CG8445                    | CAACAACAGTCTCAGCCACAAT     | GACGAATATCTCAGCAGTTGTCTC    |
| CG4265                    | GTGCCGGTAATTGTGTGTAGAA     | GAATCCATTCCAAGGTGTCATC      |
| CG3431                    | ACGGTGCTGGAATTGGTGTCTCATTG | AAGAAGATGTTCTCCCGATCCAG     |
| CG5798                    | GCATTACAAGTCACCAACACCTTC   | CCAGATTCTTCAGTCCAGTCAGT     |
| CG8334                    | TTGATCTGTTCTACGGCCAGTT     | AGTACTTGCAATCGGAGTTCAGAC    |
| CG12082                   | GTACGAGATCAAGGACACGTACAG   | GTCAGATTAAGCCAGAGGTTGTTG    |
| CG1490                    | GATTACAATAGCACACGCTACGAG   | GTACTIONGATCGAGCTATCCGTGA   |
| CG7023                    | AGCTAGCAATCATCACCAGACAAC   | AGCTAGCAATCATCACCAGACAAC    |
| CG5384                    | ACTCCTGTCAAATTCATTGAGGAC   | CAAATATAGACTTCATGGCAGACG    |
| CG8494                    | CTTGTGGAGTACATAGCAGAGCAG   | CTGCTGCTGAAGTGACTIONGTT     |
| CG3016                    | AATCGGTTACGTTTCGCTAAACTAC  | GGTAAAGATTCTTGGGGAACATC     |
| CG5603                    | GAAGTCTCGAATCCTGGAGTATGT   | GGCTGGTACAAAAATAGCTCGAC     |
| CG3781                    | AAATCGGAACTGGACGACTACTG    | CAGCTTGGAGTCCAGATTGTAGTA    |
| CG9448                    | CGGTCCCTATTGTGATTGTGTTAT   | GGTAGTTCTCGTAGGTGCAAGTTT    |
| CG4603                    | ATGGCATACTGCTGAAGAAGGT     | CTCAATGCCATAGTAGTTGGACAG    |
| CG4968                    | GAGCCTTCGCCTACTCCTACTTG    | AACCACCACGTACTIONTGTAGTAACC |
| CG2224                    | AGGTGGTCTACCCCAATGACTTT    | GTCTCGATGTTTTTCGAGGTGTT     |
| CG18174                   | CTCAATCGCCACTACTACTCGAT    | CATAACCTTGTCCACCTTCTCCT     |
| CG6932                    | GAAGGAACAACAGTACAAGCAGGT   | AGATCGATTAGGGACTCGAATAGC    |
| CG9769                    | AAGCTGCTTCAGAAGACCGTAG     | ACGGAGTGGATAAGGTCTAGCAG     |
| CG3416                    | GATAGTGCATCCATTGGTTCTG     | ACATATTCTCCAGGTAGTCGTGGT    |
| CG5505                    | GTGTCCATTACGTTTCAGCACTTC   | CTTGAAGGAAATCTGCTTGGTC      |
| CG5486                    | ACGTATCCCATCAAATTCGTTC     | TCGCTGATCTGTGATAATGAAAGT    |
| CG5794                    | GGCCTTTAAGTACTTACATCGAC    | CTCTTCAGAGATCTGGTTCTCTACC   |
| CG4165                    | GCCGTTCTACTTAGCGTACTGA     | ACTGAGGACACTTTACGCACAGC     |
| CG7288                    | CAGTCGGACAAACAGTCAACAA     | GGCATAAACATTGATCCTCGTC      |
| CG7857                    | CAGTCCATCAGACACCAACTTATC   | GATGAGATGGCCTTCAGTTCTATG    |
| CG15817                   | ACCTTGCGCTGCTACAGTCTAC     | GCTCTTGAGCCTCTTCAATTCT      |
| CG14619                   | AACGGTCTATCTCTGCTCTCAACT   | ATGTTTCAGGGATGACGAGTTC      |
| CG8830                    | GGGGAATACCTGCTACATGAATAG   | GATATCCTAGGAACTCGGAGCTGT    |
| CG6091                    | CCTGTTTCGCTCTATATCCCTTC    | CTGTAGATCTCGGAAATAGCTTGG    |
| CG30421                   | CTTTAAGGCAGTGGTAGATCGGTA   | GGTCGAATGTGTTTGACTGCTT      |
| CG2904                    | GCTCTGACCTCCCAGAAAAGTCT    | GTGTTTGCCGTAGTAGGAAACGAT    |
| CG3430                    | CAGAAGACGGGAATCCTGAAGATA   | CCTTGTCCAGCATATTGTCCATCAG   |
| CG2872                    | GGAATATGATGCAGAGAGTGTGG    | CGTAACCACAATCATGTACTGGAC    |
| CG33291                   | GGAATATGATGCAGAGAGTGTGG    | CGTAACCACAATCATGTACTGGAC    |
| CG7939<br>(rp49 control)  | AGATCGTGAAGAAGCGCACCAAG    | CACCAGGAACTTCTTGAATCCGG     |
| CG5178<br>(actin control) | GTCTACAACCTCGATCATGAAGTGC  | TACTCCTGCTTCGAGATCCACAT     |
